# Supplementary material for: Dependency of particle size distribution at dust emission on friction velocity and atmospheric boundary-layer stability
Source: Copernicus journal article supplement (doi:10.5194/acp-20-12939-2020), 2020-11-05
Supplement: Supplementary file 1 [file acp-20-12939-2020-supplement.pdf]

Supplement of Atmos. Chem. Phys., 20, 12939–12953, 2020  
<https://doi.org/10.5194/acp-20-12939-2020-supplement>  
© Author(s) 2020. This work is distributed under  
the Creative Commons Attribution 4.0 License.

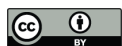

*Supplement of*

## **Dependency of particle size distribution at dust emission on friction velocity and atmospheric boundary-layer stability**

**Yaping Shao et al.**

*Correspondence to:* Jie Zhang (zhang-j@lzu.edu.cn) and Ning Huang (huangn@lzu.edu.cn)

The copyright of individual parts of the supplement might differ from the CC BY 4.0 License.

1 We use a Lagrangian stochastic model for saltation in turbulent flow to examine the intensity of saltation bombardment.  
 2 The model combines the equation of sand motion with a stochastic equation for fluid velocity fluctuations along the  
 3 saltation trajectories. Following Thomson (1987, 1990), the turbulent motion of fluid elements can be modelled with

$$4 \quad dU_i = a_i(U, X, t)dt + b_{ij}(U, X, t)d\omega_{ij} \quad (s1)$$

$$5 \quad dX_i = U_i(X, t)dt \quad (s2)$$

6 where  $U$  is fluid element Lagrangian velocity ( $U_i$  its  $i$  component),  $X$  fluid element position,  $a_i$  drift coefficient,  $b_{ij}$   
 7 diffusion coefficient and  $d\omega_{ij}$  increment of the Wiener process. Sand particle and fluid element follow different  
 8 trajectories due to the trajectory-crossing effect (Yudine, 1959; Csanady, 1963).

9 The model used in this study is two dimensional, with  $x_1$  aligned in the horizontal mean wind direction and  $x_3$  in the  
 10 vertical direction. We denote the sand particle position as  $Y$ , its velocity as  $V$ , and the fluid element velocity at  $Y$  as  $U^*$ .  
 11 The sand-particle to fluid-element relative velocity is  $V_R = V - U^*$ .

12 The equation of sand particle motion is written as

$$13 \quad \frac{dV_i}{dt} = -\frac{V_{Ri}}{\tau_p} - \delta_{i3}g \quad (i = 1, 3) \quad (s3)$$

14 with  $\tau_p$  being the sand particle response time (Morsi and Alexander, 1972).  $V_{Ri}$  is given by  $V_{R1} = V_1 - \overline{U}_1^* - u_1^*$  and  
 15  $V_{R3} = V_3 - u_3^*$ , where  $\overline{U}_1^*$  is the mean wind speed at sand particle location. The influences of turbulence on sand particle  
 16 motion are embedded in  $u_1^*$  and  $u_3^*$ . These are calculated using a modified Thomson (1987) model. Note that  $U = \overline{U} + u$   
 17 and  $u = (u_1, u_3)$ .  $\overline{U}$  is assumed to be known, and the fluid element motion fluctuations ( $u_1, u_3$ ) are calculated by using  
 18 Equations (a1) and (a2). The diffusion coefficients  $b_{ij}$  are given by

$$19 \quad b_{ij} = \delta_{ij}\sqrt{C_0\varepsilon} \quad (s4)$$

20 where  $\delta_{ij}$  is Kronecker delta,  $C_0$  a constant and  $\varepsilon$  the dissipation rate for turbulent kinetic energy. The determination of  $a_i$   
 21 uses the well-mixed condition of Thomson (1987), which leads to

$$22 \quad a_i P = \frac{1}{2} \frac{\partial C_0 \varepsilon P}{\partial U_i} + \varphi_i \quad (s5)$$

23 and

$$24 \quad \frac{\partial \varphi_i}{\partial U_i} = -\frac{\partial P}{\partial t} - \frac{\partial U_i P}{\partial X_i} \quad (s6)$$

25 with  $P$  being the phase-space probability density function  $P(U, X, t)$ . The well-mixed condition requires that  $P$  equals to  
 26 the probability density function of the Eulerian velocity  $U(x=X, t)$ .

27 The increment  $du_i^*$  is expressed as

$$28 \quad du_i^* = du_i + \delta u_i \quad (s7)$$

29 where  $du_i$  is the fluid-element velocity increment between  $t$  and  $t+dt$ , computed using Equation (s1), and  $\delta u_i$  the spatial  
 30 velocity increment at  $t+dt$  between the two points separated by  $V_R dt$ . While the structure function of  $du_i$  satisfies

$$31 \quad \langle du_i du_i \rangle = C_0 \varepsilon dt, \quad (s8)$$

32 that of  $\delta u_i$  satisfies

$$33 \quad \langle \delta u_i \delta u_i \rangle = C_1 \varepsilon^{2/3} V_R^{2/3} dt^{2/3}. \quad (s9)$$

34 Due to its fractional nature,  $\delta u_i$  is difficult to generate stochastically and it is in this study assumed to be

36 
$$\langle \delta u_i \delta u_i \rangle = C_1 \varepsilon^{2/3} V_R l^{-1/3} dt \quad (s10)$$

37 with  $l$  being a fixed scaling length. Following Hanna (1981) and Stull (1988),  $C_0 = 5$  and  $C_1 = 2$ .

38 Sand particles are randomly lifted from the surface with velocity  $(V_{1o}, V_{3o})$ . The PDF of  $V_{1o}$  is assumed to be Gaussian  
39 and that of  $V_{3o}$  Weibull (to avoid negative liftoff speed). The sand-particle liftoff angle is confined to  $0^\circ$  and  $180^\circ$  and  
40 Gaussian distributed with a mean liftoff angle of  $55^\circ$  and a standard deviation of  $5^\circ$ . The sand particles are allowed to  
41 rebound from the surface with the rebounding kinetic energy half the impacting kinetic energy and a mean rebounding  
42 angle of  $40^\circ$ . If the kinetic energy of a sand particle becomes lower than a critical value, its motion is stopped.

43  
44 **References:**

- 45 Csanady, G. T., Turbulent Diffusion of Heavy Particles in the Atmosphere. *J. Atmospheric Sci.*, 20(3), 201-208,  
46 [https://doi.org/10.1175/1520-0469\(1963\)020<0201:TDOHPI>2.0.CO;2](https://doi.org/10.1175/1520-0469(1963)020<0201:TDOHPI>2.0.CO;2), 1963.  
47 Hanna, S. R., Lagrangian and Eulerian Time-Scale Relations in the Daytime Boundary Layer. *J. Appl. Meteorol.*,  
48 20(3), 242-249, [https://doi.org/10.1175/1520-0450\(1981\)020<0242:LAETSR>2.0.CO;2](https://doi.org/10.1175/1520-0450(1981)020<0242:LAETSR>2.0.CO;2), 1981.  
49 Morsi, S. A. and Alexander, A. J., An Investigation of Particle Trajectories in Two-Phase Flow Systems. *J. Fluid*  
50 *Mech.*, 55, 193-208, <https://doi.org/10.1017/S0022112072001806>, 1972.  
51 Stull, R. B., An Introduction to Boundary Layer Meteorology. Kluwer Academic Publishers, Boston,  
52 <http://dx.doi.org/10.1007/978-94-009-3027-8>, 1988.  
53 Thomson, D. J., Criteria for the Selection of Stochastic Models of Particle Trajectories in Turbulent Flows. *J. Fluid*  
54 *Mech.*, 180(4), 529-556, <https://doi.org/10.1017/S0022112087001940>, 1987.  
55 Thomson, D. J., A Stochastic Model for the Motion of Particle Pairs in Isotropic High-Reynolds-Number Turbulence,  
56 and its Application to the Problem of Concentration Variance. *J. Fluid Mech.*, 210(-1), 113-153,  
57 <https://doi.org/10.1017/S0022112090001239>, 1990.  
58 Yudine, M. I., Physical Considerations on Heavy-Particle Diffusion. *Advances in Geophysics*, 6, 185-191,  
59 [https://doi.org/10.1016/S0065-2687\(08\)60106-5](https://doi.org/10.1016/S0065-2687(08)60106-5), 1959.

60
